# Supplementary figures and images for: High-throughput microrespirometric characterization of activated sludge inhibition by silver nanoparticles
Source: Royal Society of Chemistry journal article supplement (doi:10.1039/c7ew00563f), 2018-01-01

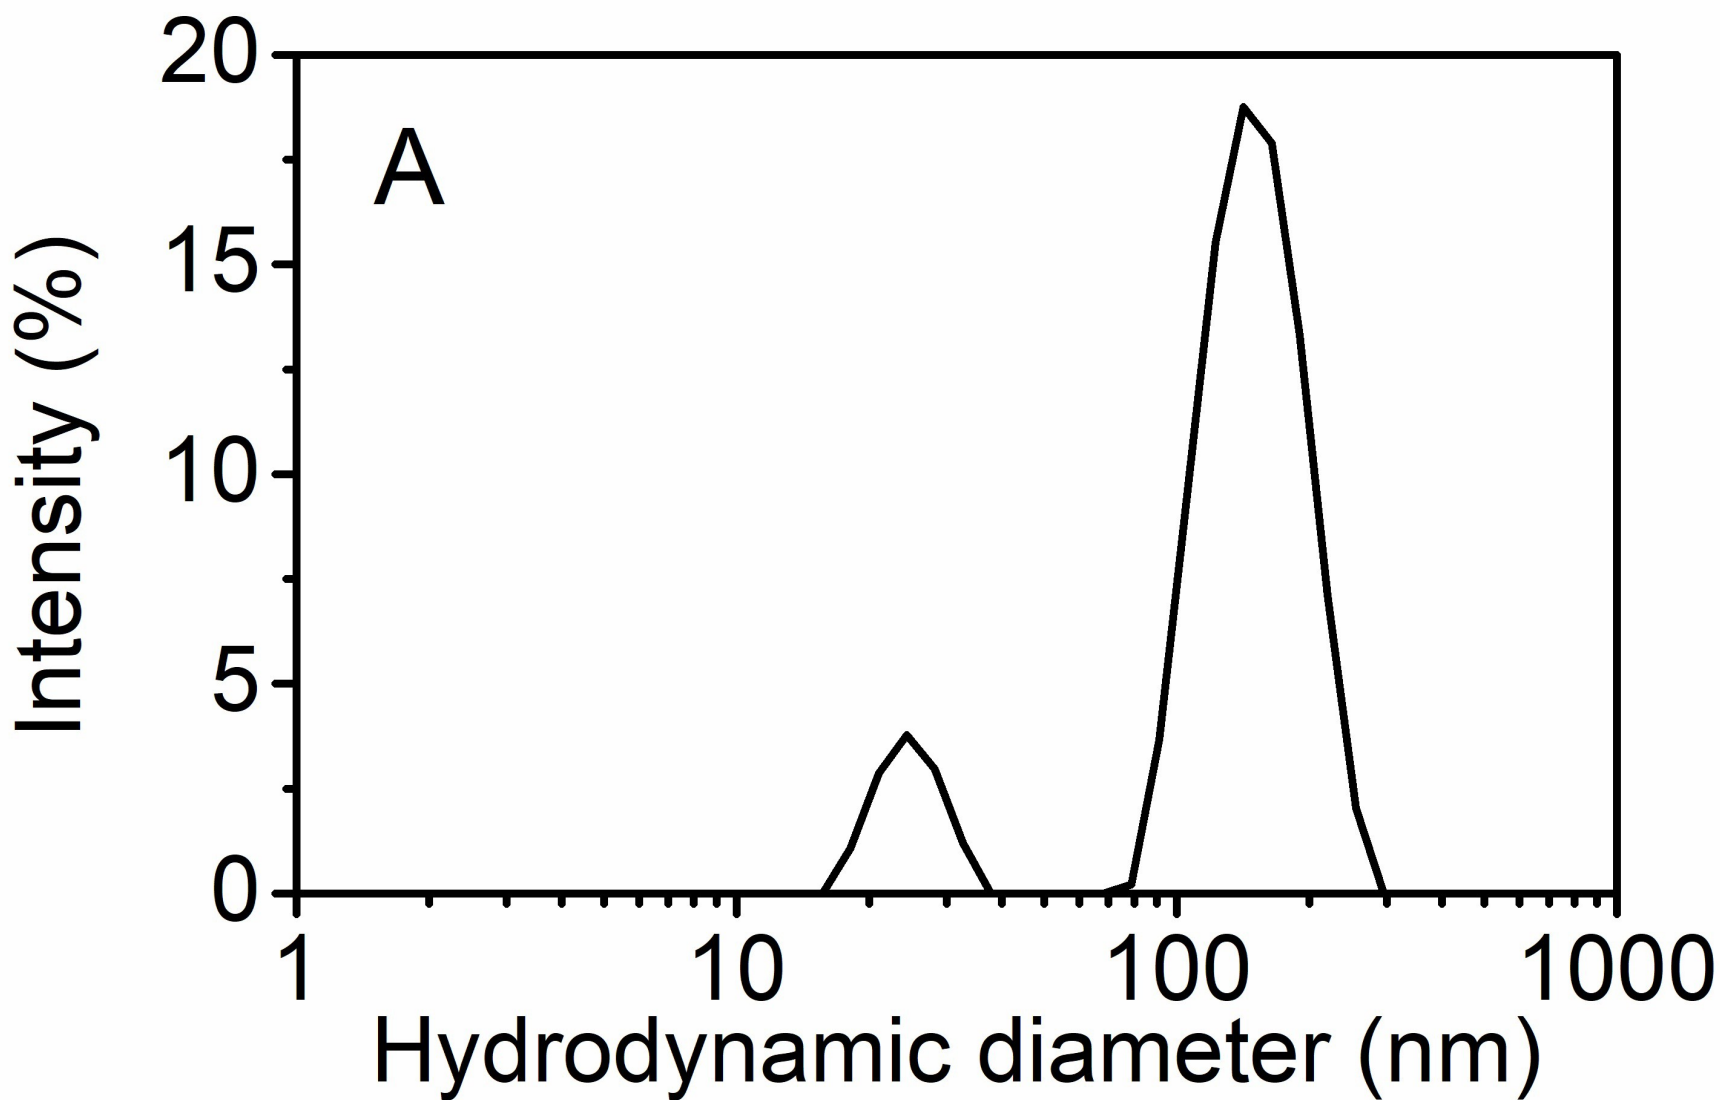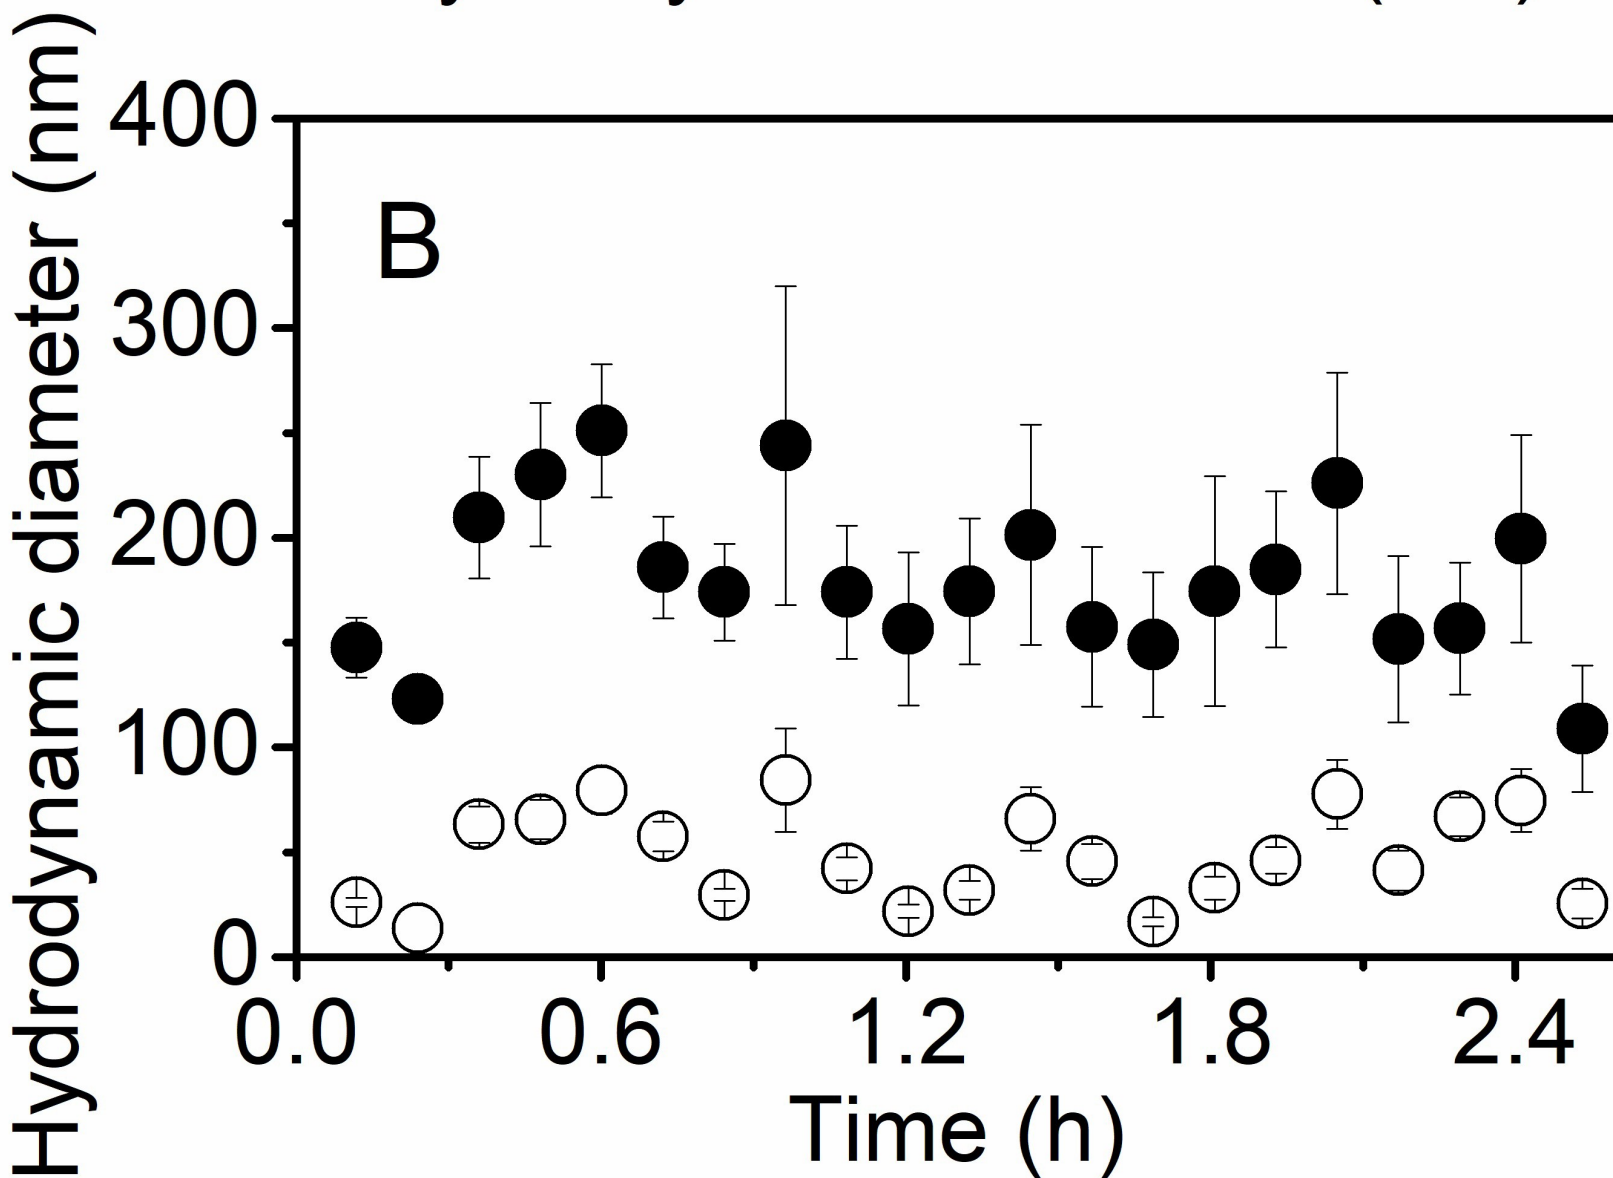

Supplement: c7ew00563f2.pdf [file c7ew00563f2.pdf]

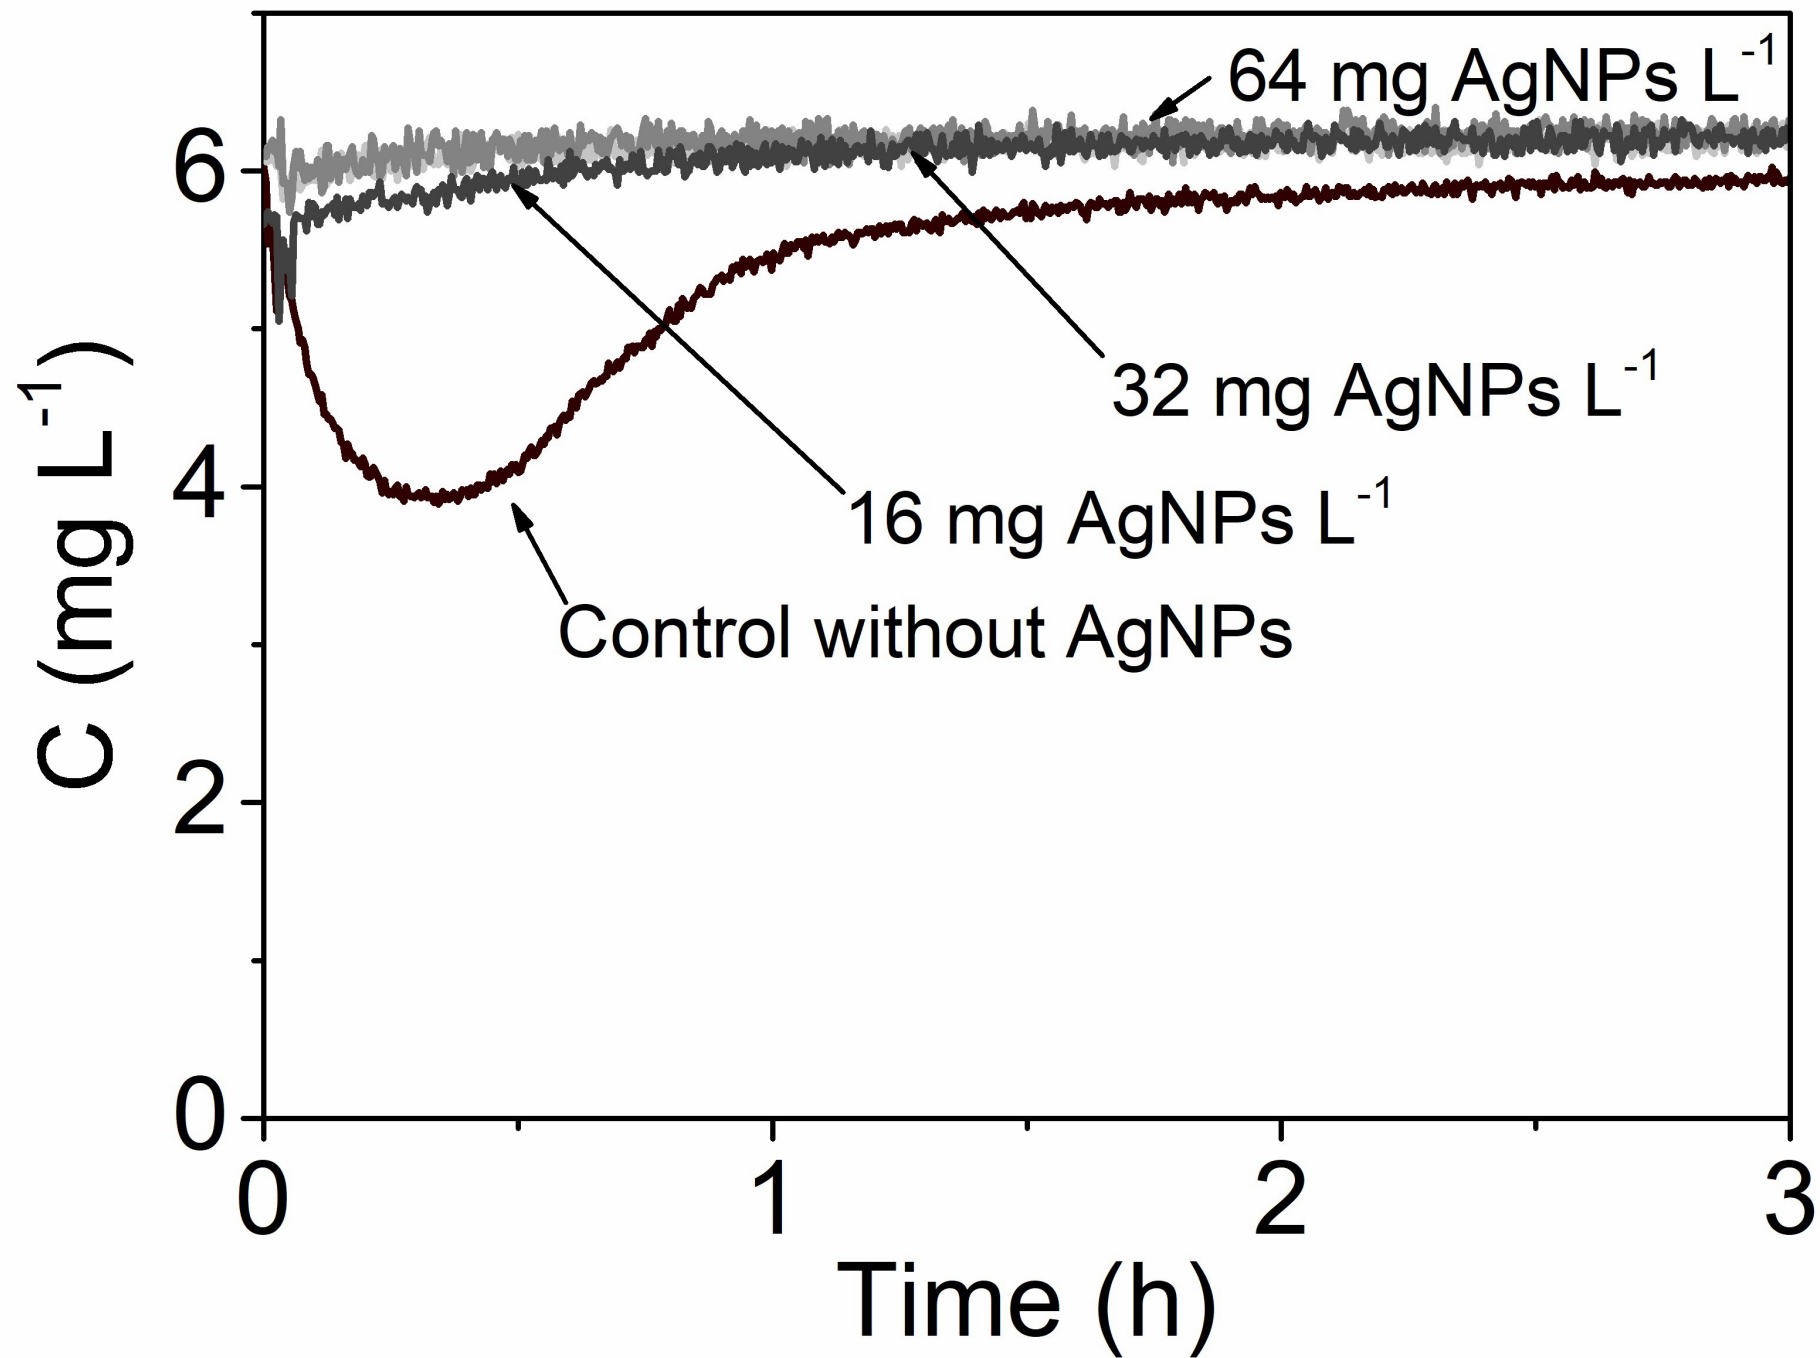

Supplement: c7ew00563f3.pdf [file c7ew00563f3.pdf]
